# Supplementary material for: Gut Microbiota‐Dependent Trimethylamine N‐oxide and Cardiovascular Outcomes in Patients With Prior Myocardial Infarction: A Nested Case Control Study From the PEGASUS‐TIMI 54 Trial
Source: PubMed Central journal article supplement — J Am Heart Assoc. 2020 May 5;9(10):e015331. doi: 10.1161/JAHA.119.015331 (PMC7660879; doi:10.1161/jaha.119.015331), 2020-05-05
Supplement: JAH3-9-e015331-s001.pdf [file JAH3-9-e015331-s001.pdf]

# **SUPPLEMENTAL MATERIAL**

**Table S1. Baseline characteristics of the full PEGASUS-TIMI 54 trial vs. the TMAO Nested Case-Control Cohort.**

| Variable                     | Entire Trial (N=21,162) | TMAO Nested Case-Control Cohort (N=1,803) |
|------------------------------|-------------------------|-------------------------------------------|
| <b>Matched variables</b>     |                         |                                           |
| Age (median, IQR)            | 65 (59, 71)             | 67.9 (59.5, 74)                           |
| Female (n, %)                | 5,050 (23.9)            | 462 (25.6)                                |
| eGFR (median, IQR)           | 72.4 (61.0, 84.0)       | 68.2 (55.0, 79.8)                         |
| <b>Other variables</b>       |                         |                                           |
| BMI (median, IQR)            | 27.8 (25.2, 31.2)       | 28.7 (25.7, 32.0)                         |
| White race (n, %)            | 18,327 (86.6)           | 1,736 (96.3)                              |
| Region                       |                         |                                           |
| <i>Eastern Europe (n, %)</i> | 6,290 (29.7)            | 584 (32.4)                                |
| <i>North America (n, %)</i>  | 3,907 (18.5)            | 654 (36.3)                                |
| <i>Western Europe (n, %)</i> | 6,138 (29.0)            | 565 (31.3)                                |
| <i>Asia/Pacific</i>          | 2,369 (11.2)            | 0 (0)                                     |
| <i>South America</i>         | 2,458 (11.6)            | 0 (0)                                     |
| Current smoking (n, %)       | 3,536 (16.7)            | 353 (19.6)                                |
| Hypertension (n, %)          | 16,407 (77.5)           | 1,480 (80.2)                              |
| Dyslipidemia (n, %)          | 16,241 (76.8)           | 1,480 (82.1)                              |
| Diabetes mellitus (n, %)     | 6,806 (32.2)            | 612 (33.9)                                |
| Multivessel CAD (n, %)       | 12,558 (59.4)           | 1,154 (64.0)                              |
| > 1 Prior MI (n, %)          | 3,499 (16.5)            | 366 (20.3)                                |
| History of PAD (n, %)        | 1,143 (5.4)             | 170 (9.4)                                 |
| Qualifying event             |                         |                                           |
| <i>STEMI (n, %)</i>          | 11,329 (53.6)           | 846 (47.0)                                |
| <i>NSTEMI (n, %)</i>         | 8583 (40.6)             | 899 (49.9)                                |

|                                       |                |                |
|---------------------------------------|----------------|----------------|
| <i>Years from event (median, IQR)</i> | 1.7 (1.2, 2.3) | 1.7 (1.2, 2.3) |
| <b>Medications</b>                    |                |                |
| <i>Aspirin (n, %)</i>                 | 21,132 (99.9)  | 1800 (99.8)    |
| <i>Statin (n, %)</i>                  | 19,604 (92.6)  | 1,685 (93.5)   |
| <i>Beta-blocker (n, %)</i>            | 17,486 (82.6)  | 1,547 (85.8)   |
| <i>ACEI or ARB (n, %)</i>             | 17,030 (80.5)  | 1424 (79.0)    |

ACEI, angiotensin-converting enzyme inhibitor; ARB, angiotensin receptor blocker; BMI, body mass index; CAD, coronary artery disease; eGFR, estimated glomerular filtration rate; IQR, interquartile range; MI, myocardial infarction; NSTEMI, Non-ST-elevation myocardial infarction; PAD, peripheral artery disease; STEMI, ST-elevation myocardial infarction; TMAO, Trimethylamine N-oxide

**Table S2. Spearman Correlation Between TMAO and Cardiovascular Markers.**

|                                  | <b>TMAO</b>     | <b>Betaine</b>  | <b>Choline</b>  |
|----------------------------------|-----------------|-----------------|-----------------|
| TMAO ( $\mu\text{M}$ )           | 1.00            | -0.03 (P=0.29)  | 0.26 (P<0.001)  |
| Betaine ( $\mu\text{M}$ )        | -0.03 (P=0.29)  | 1.00            | 0.35 (P<0.001)  |
| Choline ( $\mu\text{M}$ )        | 0.26 (P<0.001)  | 0.35 (P<0.001)  | 1.00            |
|                                  |                 |                 |                 |
| Age (years)                      | 0.21 (P<0.001)  | 0.07 (P=0.004)  | 0.19 (P<0.001)  |
| Weight (kgs)                     | 0.05 (P=0.044)  | -0.16 (P<0.001) | 0.02 (P=0.47)   |
| eGFR(ml/min/1.73m <sup>2</sup> ) | -0.41 (P<0.001) | 0.04 (P=0.11)   | -0.30 (P<0.001) |
| BMI (mg/m <sup>2</sup> )         | 0.11 (P<0.001)  | -0.19 (P<0.001) | 0.07 (P=0.002)  |
| Hs-TnT (ng/L)                    | 0.29 (P<0.001)  | 0.04 (P=0.061)  | 0.25 (P<0.001)  |
| NT-pro BNP (ng/mL)               | 0.20 (P<0.001)  | 0.12 (P<0.001)  | 0.18 (P<0.001)  |
| Hs-CRP (mg/dL)                   | 0.08 (P<0.001)  | -0.06 (P=0.020) | 0.10 (P<0.001)  |

BMI, body mass index; eGFR, estimates glomerular filtration; Hs-CRP, high sensitive C-reactive protein; Hs-TnT, high sensitive Troponin T; MI, myocardial infarction; NT-pro BNP, N-terminal pro B-type natriuretic peptide; TMAO, trimethylamine N-oxide. All biomarkers were log-transformed for this analysis.

**Table S3. Risk of Cardiovascular Events by 1-SD Log-Transformed TMAO Increase.**

| Odds Ratios for Primary Endpoint (CV death, MI and Stroke) by 1-SD Log-Transformed TMAO Increase                                                                                                                                                                                                                                                                                                                                                                                                                                                                                                                                                                                                                                                                                                                                                                                                                                                                                                                                                                                                                                                                                                                                                                                              |                           |
|-----------------------------------------------------------------------------------------------------------------------------------------------------------------------------------------------------------------------------------------------------------------------------------------------------------------------------------------------------------------------------------------------------------------------------------------------------------------------------------------------------------------------------------------------------------------------------------------------------------------------------------------------------------------------------------------------------------------------------------------------------------------------------------------------------------------------------------------------------------------------------------------------------------------------------------------------------------------------------------------------------------------------------------------------------------------------------------------------------------------------------------------------------------------------------------------------------------------------------------------------------------------------------------------------|---------------------------|
|                                                                                                                                                                                                                                                                                                                                                                                                                                                                                                                                                                                                                                                                                                                                                                                                                                                                                                                                                                                                                                                                                                                                                                                                                                                                                               | <b>OR (95% CI)</b>        |
| Matched *                                                                                                                                                                                                                                                                                                                                                                                                                                                                                                                                                                                                                                                                                                                                                                                                                                                                                                                                                                                                                                                                                                                                                                                                                                                                                     | 1.09 (0.98-1.21, P=0.12)  |
| Matched with clinical adjustment #                                                                                                                                                                                                                                                                                                                                                                                                                                                                                                                                                                                                                                                                                                                                                                                                                                                                                                                                                                                                                                                                                                                                                                                                                                                            | 1.05 (0.93-1.18, P=0.43)  |
| Matched with clinical and biomarker adjustment †                                                                                                                                                                                                                                                                                                                                                                                                                                                                                                                                                                                                                                                                                                                                                                                                                                                                                                                                                                                                                                                                                                                                                                                                                                              | 1.05 (0.92-1.19, P=0.47)  |
| Odds Ratios for CV Death by 1-SD Log-Transformed TMAO Increase                                                                                                                                                                                                                                                                                                                                                                                                                                                                                                                                                                                                                                                                                                                                                                                                                                                                                                                                                                                                                                                                                                                                                                                                                                |                           |
| Matching variable adjustment ¶                                                                                                                                                                                                                                                                                                                                                                                                                                                                                                                                                                                                                                                                                                                                                                                                                                                                                                                                                                                                                                                                                                                                                                                                                                                                | 1.22 (1.01-1.48, P=0.035) |
| Multivariate clinical adjustment §                                                                                                                                                                                                                                                                                                                                                                                                                                                                                                                                                                                                                                                                                                                                                                                                                                                                                                                                                                                                                                                                                                                                                                                                                                                            | 1.13 (0.92-1.39, P=0.24)  |
| Multivariate with clinical and biomarker adjustment †                                                                                                                                                                                                                                                                                                                                                                                                                                                                                                                                                                                                                                                                                                                                                                                                                                                                                                                                                                                                                                                                                                                                                                                                                                         | 1.07 (0.85-1.34, P=0.58)  |
| Odds Ratios for MI by 1-SD Log-Transformed TMAO Increase                                                                                                                                                                                                                                                                                                                                                                                                                                                                                                                                                                                                                                                                                                                                                                                                                                                                                                                                                                                                                                                                                                                                                                                                                                      |                           |
| Matching variable adjustment ¶                                                                                                                                                                                                                                                                                                                                                                                                                                                                                                                                                                                                                                                                                                                                                                                                                                                                                                                                                                                                                                                                                                                                                                                                                                                                | 1.04 (0.92-1.18, P=0.51)  |
| Multivariate clinical adjustment §                                                                                                                                                                                                                                                                                                                                                                                                                                                                                                                                                                                                                                                                                                                                                                                                                                                                                                                                                                                                                                                                                                                                                                                                                                                            | 0.99 (0.87-1.12, P=0.86)  |
| Multivariate with clinical and biomarker adjustment †                                                                                                                                                                                                                                                                                                                                                                                                                                                                                                                                                                                                                                                                                                                                                                                                                                                                                                                                                                                                                                                                                                                                                                                                                                         | 0.94 (0.83-1.08, P=0.38)  |
| Odds Ratios for Stroke by 1-SD Log-Transformed TMAO Increase                                                                                                                                                                                                                                                                                                                                                                                                                                                                                                                                                                                                                                                                                                                                                                                                                                                                                                                                                                                                                                                                                                                                                                                                                                  |                           |
| Matching variable adjustment ¶                                                                                                                                                                                                                                                                                                                                                                                                                                                                                                                                                                                                                                                                                                                                                                                                                                                                                                                                                                                                                                                                                                                                                                                                                                                                | 1.25 (1.01-1.53, P=0.038) |
| Multivariate clinical adjustment §                                                                                                                                                                                                                                                                                                                                                                                                                                                                                                                                                                                                                                                                                                                                                                                                                                                                                                                                                                                                                                                                                                                                                                                                                                                            | 1.11 (0.88-1.39, P=0.38)  |
| Multivariate with clinical and biomarker adjustment †                                                                                                                                                                                                                                                                                                                                                                                                                                                                                                                                                                                                                                                                                                                                                                                                                                                                                                                                                                                                                                                                                                                                                                                                                                         | 1.10 (0.87-1.39, P=0.44)  |
| <p>* Conditional (matched) logistic regression was used for the primary endpoint with matching variables (age, sex, eGFR). # In addition to matching variables (age, sex and eGFR), further adjustment was performed for the following clinical variables: hypertension, hypercholesterolemia, diabetes mellitus, peripheral artery disease, qualifying index event, smoking, region, body mass index, aspirin dosage and treatment arm. ¶ In addition to matching and clinical variables, further adjustment was done for log-transformed biomarkers (hs-TnT, NT-proBNP and hs-CRP). ¶ Unconditional (unmatched) logistic regression was used for each individual component CV death, MI and stroke events. § Multivariable adjustment (unmatched) was performed for the following clinical variables: age, sex, eGFR, hypertension, hypercholesterolemia, diabetes mellitus, peripheral artery disease, qualifying index event, smoking, region, body mass index aspirin dosage and treatment arm. † In addition to multivariate clinical variables adjustment, further adjustment was done for log-transformed biomarkers (hs-TnT, NT-proBNP and hs-CRP).<br/>CV, Cardiovascular; eGFR, estimated glomerular filtration rate; MI, myocardial infarction; TMAO, Trimethylamine N-oxide.</p> |                           |

**Table S4. Risk of Cardiovascular Events by TMAO Quartiles and eGFR Status (< 60 vs. ≥ 60 ml/min/1.73m<sup>2</sup>).**

| Adjusted Odds Ratios for Primary Endpoint (CV death, MI and Stroke) by TMAO Quartiles *                                                                                                                                                                                                                                                                                                                                                                                                                                                                                                                                                                                                                                                                                                                                                                                           |                          |                          |                          |
|-----------------------------------------------------------------------------------------------------------------------------------------------------------------------------------------------------------------------------------------------------------------------------------------------------------------------------------------------------------------------------------------------------------------------------------------------------------------------------------------------------------------------------------------------------------------------------------------------------------------------------------------------------------------------------------------------------------------------------------------------------------------------------------------------------------------------------------------------------------------------------------|--------------------------|--------------------------|--------------------------|
|                                                                                                                                                                                                                                                                                                                                                                                                                                                                                                                                                                                                                                                                                                                                                                                                                                                                                   | 2 <sup>nd</sup> Quartile | 3 <sup>rd</sup> Quartile | 4 <sup>th</sup> Quartile |
| eGFR ≥ 60                                                                                                                                                                                                                                                                                                                                                                                                                                                                                                                                                                                                                                                                                                                                                                                                                                                                         | 1.77 (0.81-3.84)         | 2.03(0.96-4.28)          | 2.14 (1.04-4.40)         |
| eGFR < 60                                                                                                                                                                                                                                                                                                                                                                                                                                                                                                                                                                                                                                                                                                                                                                                                                                                                         | 0.94 (0.68-1.30)         | 1.07 (0.77-1.50)         | 0.99 (0.68-1.46)         |
| P for overall interaction = 0.29                                                                                                                                                                                                                                                                                                                                                                                                                                                                                                                                                                                                                                                                                                                                                                                                                                                  |                          |                          |                          |
| Adjusted Odds Ratios for CV Death by TMAO Quartiles ¶                                                                                                                                                                                                                                                                                                                                                                                                                                                                                                                                                                                                                                                                                                                                                                                                                             |                          |                          |                          |
| eGFR ≥ 60                                                                                                                                                                                                                                                                                                                                                                                                                                                                                                                                                                                                                                                                                                                                                                                                                                                                         | 3.22 (0.67-15.39)        | 1.83 (0.38-8.81)         | 3.17 (0.71-14.05)        |
| eGFR < 60                                                                                                                                                                                                                                                                                                                                                                                                                                                                                                                                                                                                                                                                                                                                                                                                                                                                         | 0.99 (0.50-1.96)         | 1.95 (1.05-3.64)         | 1.31 (0.63-2.73)         |
| P for overall interaction = 0.097                                                                                                                                                                                                                                                                                                                                                                                                                                                                                                                                                                                                                                                                                                                                                                                                                                                 |                          |                          |                          |
| Adjusted Odds Ratios for MI by TMAO Quartiles ¶                                                                                                                                                                                                                                                                                                                                                                                                                                                                                                                                                                                                                                                                                                                                                                                                                                   |                          |                          |                          |
| eGFR ≥ 60                                                                                                                                                                                                                                                                                                                                                                                                                                                                                                                                                                                                                                                                                                                                                                                                                                                                         | 1.61 (0.66-3.96)         | 1.93 (0.83-4.52)         | 1.52 (0.66-3.48)         |
| eGFR < 60                                                                                                                                                                                                                                                                                                                                                                                                                                                                                                                                                                                                                                                                                                                                                                                                                                                                         | 0.87 (0.61-1.25)         | 0.93 (0.64-1.36)         | 0.95 (0.63-1.46)         |
| P for overall interaction = 0.44                                                                                                                                                                                                                                                                                                                                                                                                                                                                                                                                                                                                                                                                                                                                                                                                                                                  |                          |                          |                          |
| Adjusted Odds Ratios for Stroke by TMAO Quartiles ¶                                                                                                                                                                                                                                                                                                                                                                                                                                                                                                                                                                                                                                                                                                                                                                                                                               |                          |                          |                          |
| eGFR ≥ 60                                                                                                                                                                                                                                                                                                                                                                                                                                                                                                                                                                                                                                                                                                                                                                                                                                                                         | 0.97 (0.17-5.57)         | 2.39 (0.52-11.09)        | 2.23 (0.50-10.04)        |
| eGFR < 60                                                                                                                                                                                                                                                                                                                                                                                                                                                                                                                                                                                                                                                                                                                                                                                                                                                                         | 1.32 (0.61-2.85)         | 1.76 (0.82-3.77)         | 2.22 (1.01-4.87)         |
| P for overall interaction = 0.84                                                                                                                                                                                                                                                                                                                                                                                                                                                                                                                                                                                                                                                                                                                                                                                                                                                  |                          |                          |                          |
| <p>CV, Cardiovascular disease; eGFR, estimated glomerular filtration rate; MI, myocardial infarction; TMAO, Trimethylamine N-oxide.</p> <p>* Conditional (matched) logistic regression was used for the primary endpoint with matching variables (age, sex, eGFR). In addition to matching variables (age, sex and eGFR), further adjustment was performed for the following clinical variables: hypertension, hypercholesterolemia, diabetes mellitus, peripheral artery disease, qualifying index event, smoking, region, body mass index, aspirin dosage and treatment arm.</p> <p>¶Multivariable adjustment (unmatched) was performed for the following clinical variables: age, sex, eGFR, hypertension, hypercholesterolemia, diabetes mellitus, peripheral artery disease, qualifying index event, smoking, region, body mass index, aspirin dosage and treatment arm.</p> |                          |                          |                          |

| <b>Table S5. Risk of Cardiovascular Events by TMAO Quartiles and Antiplatelet Regimen.</b>                                                                                                                                                                                                                                                                                                                                                                                                                                                                                                                                                                                                                       |                          |                          |                          |
|------------------------------------------------------------------------------------------------------------------------------------------------------------------------------------------------------------------------------------------------------------------------------------------------------------------------------------------------------------------------------------------------------------------------------------------------------------------------------------------------------------------------------------------------------------------------------------------------------------------------------------------------------------------------------------------------------------------|--------------------------|--------------------------|--------------------------|
| Odds Ratios for Primary Endpoint (CV death, MI and Stroke) by TMAO Quartiles                                                                                                                                                                                                                                                                                                                                                                                                                                                                                                                                                                                                                                     |                          |                          |                          |
|                                                                                                                                                                                                                                                                                                                                                                                                                                                                                                                                                                                                                                                                                                                  | 2 <sup>nd</sup> Quartile | 3 <sup>rd</sup> Quartile | 4 <sup>th</sup> Quartile |
| Placebo                                                                                                                                                                                                                                                                                                                                                                                                                                                                                                                                                                                                                                                                                                          | 1.05 (0.47-2.37)         | 1.23 (0.49-3.09)         | 1.56 (0.60-4.02)         |
| Pooled Ticagrelor                                                                                                                                                                                                                                                                                                                                                                                                                                                                                                                                                                                                                                                                                                | 0.92 (0.59-1.44)         | 1.09 (0.71-1.68)         | 1.18 (0.75-1.87)         |
| P for overall interaction = 0.952                                                                                                                                                                                                                                                                                                                                                                                                                                                                                                                                                                                                                                                                                |                          |                          |                          |
| Odds Ratios for CV Death by TMAO Quartiles §                                                                                                                                                                                                                                                                                                                                                                                                                                                                                                                                                                                                                                                                     |                          |                          |                          |
| Placebo                                                                                                                                                                                                                                                                                                                                                                                                                                                                                                                                                                                                                                                                                                          | 1.06 (0.41-2.72)         | 1.22(0.49-3.02)          | 1.31 (0.51-3.36)         |
| Pooled Ticagrelor                                                                                                                                                                                                                                                                                                                                                                                                                                                                                                                                                                                                                                                                                                | 1.55 (0.73-3.28)         | 2.17 (1.04-4.53)         | 2.34 (1.12-4.89)         |
| P for overall interaction = 0.742                                                                                                                                                                                                                                                                                                                                                                                                                                                                                                                                                                                                                                                                                |                          |                          |                          |
| Odds Ratios for MI by TMAO Quartiles §                                                                                                                                                                                                                                                                                                                                                                                                                                                                                                                                                                                                                                                                           |                          |                          |                          |
| Placebo                                                                                                                                                                                                                                                                                                                                                                                                                                                                                                                                                                                                                                                                                                          | 1.06 (0.62-1.79)         | 0.83 (0.48-1.45)         | 0.99 (0.56-1.74)         |
| Pooled Ticagrelor                                                                                                                                                                                                                                                                                                                                                                                                                                                                                                                                                                                                                                                                                                | 0.88 (0.58-1.34)         | 1.23 (0.82-1.86)         | 0.99 (0.65-1.52)         |
| P for overall interaction = 0.399                                                                                                                                                                                                                                                                                                                                                                                                                                                                                                                                                                                                                                                                                |                          |                          |                          |
| Odds Ratios for Stroke by TMAO Quartiles §                                                                                                                                                                                                                                                                                                                                                                                                                                                                                                                                                                                                                                                                       |                          |                          |                          |
| Placebo                                                                                                                                                                                                                                                                                                                                                                                                                                                                                                                                                                                                                                                                                                          | 1.12 (0.32-3.85)         | 2.36 (0.79-7.04)         | 2.28 (0.74-7.00)         |
| Pooled Ticagrelor                                                                                                                                                                                                                                                                                                                                                                                                                                                                                                                                                                                                                                                                                                | 1.24 (0.538-2.93)        | 1.65 (0.72--3.74)        | 1.91 (0.85-4.32)         |
| P for overall interaction = 0.895                                                                                                                                                                                                                                                                                                                                                                                                                                                                                                                                                                                                                                                                                |                          |                          |                          |
| <p># In addition to matching variables (age, sex and eGFR), further adjustment was performed for the following clinical variables: hypertension, hypercholesterolemia, diabetes mellitus, peripheral artery disease, qualifying index event, smoking, region, body mass index, aspirin dosage and treatment arm.</p> <p>§ Multivariable adjustment (unmatched) was performed for the following clinical variables: age, sex, eGFR, hypertension, hypercholesterolemia, diabetes mellitus, peripheral artery disease, qualifying index event, smoking, region, body mass index, aspirin dosage and treatment arm.</p> <p>CV, Cardiovascular disease; MI, myocardial infarction; TMAO, Trimethylamine N-oxide.</p> |                          |                          |                          |

**Table S6. Risk of Cardiovascular Events by Choline and Betaine Quartiles.**

| Odds Ratios for Primary Endpoint (CV death, MI and Stroke) # |                          |                          |                          |             |
|--------------------------------------------------------------|--------------------------|--------------------------|--------------------------|-------------|
|                                                              | 2 <sup>nd</sup> Quartile | 3 <sup>rd</sup> Quartile | 4 <sup>th</sup> Quartile | P for trend |
| Choline                                                      | 1.03 (0.77-1.39)         | 1.28 (0.95-1.72)         | 1.06 (0.78-1.44)         | P=0.43      |
| Betaine                                                      | 0.78 (0.58-1.04)         | 0.75 (0.56-1.01)         | 0.81 (0.60-1.09)         | P=0.16      |
| Odds Ratios for CV Death §                                   |                          |                          |                          | P for trend |
| Choline                                                      | 0.81 (0.47-1.39)         | 1.04 (0.61-1.76)         | 0.64 (0.37-1.13)         | P=0.24      |
| Betaine                                                      | 0.78 (0.47-1.31)         | 0.76 (0.44-1.32)         | 1.24 (0.75-2.06)         | P=0.41      |
| Odds Ratios for MI §                                         |                          |                          |                          | P for trend |
| Choline                                                      | 1.07 (0.77-1.49)         | 1.33 (0.95-1.85)         | 1.15 (0.81-1.62)         | P=0.25      |
| Betaine                                                      | 0.82 (0.60-1.13)         | 0.80 (0.58-1.10)         | 0.77 (0.55-1.08)         | P=0.13      |
| Odds Ratios for Stroke §                                     |                          |                          |                          | P for trend |
| Choline                                                      | 0.98 (0.53-1.81)         | 1.22 (0.67-2.20)         | 0.82 (0.44-1.56)         | P=0.71      |
| Betaine                                                      | 0.71 (0.40-1.26)         | 0.83 (0.47-1.47)         | 0.89 (0.50-1.59)         | P=0.79      |

# In addition to matching variables (age, sex and eGFR), further adjustment was performed for the following clinical variables: hypertension, hypercholesterolemia, diabetes mellitus, peripheral artery disease, qualifying index event, smoking, region, body mass index, aspirin dosage and treatment arm.

§ Multivariable adjustment (unmatched) was performed for the following clinical variables: age, sex, eGFR, hypertension, hypercholesterolemia, diabetes mellitus, peripheral artery disease, qualifying index event, smoking, region, body mass index, aspirin dosage and treatment arm.

CV, Cardiovascular disease; MI, myocardial infarction.



**Figure S1. Treatment Effect of Ticagrelor Versus Placebo on the Composite and Individual Endpoints of CV Death, MI and Stroke By TMAO Quartiles.**

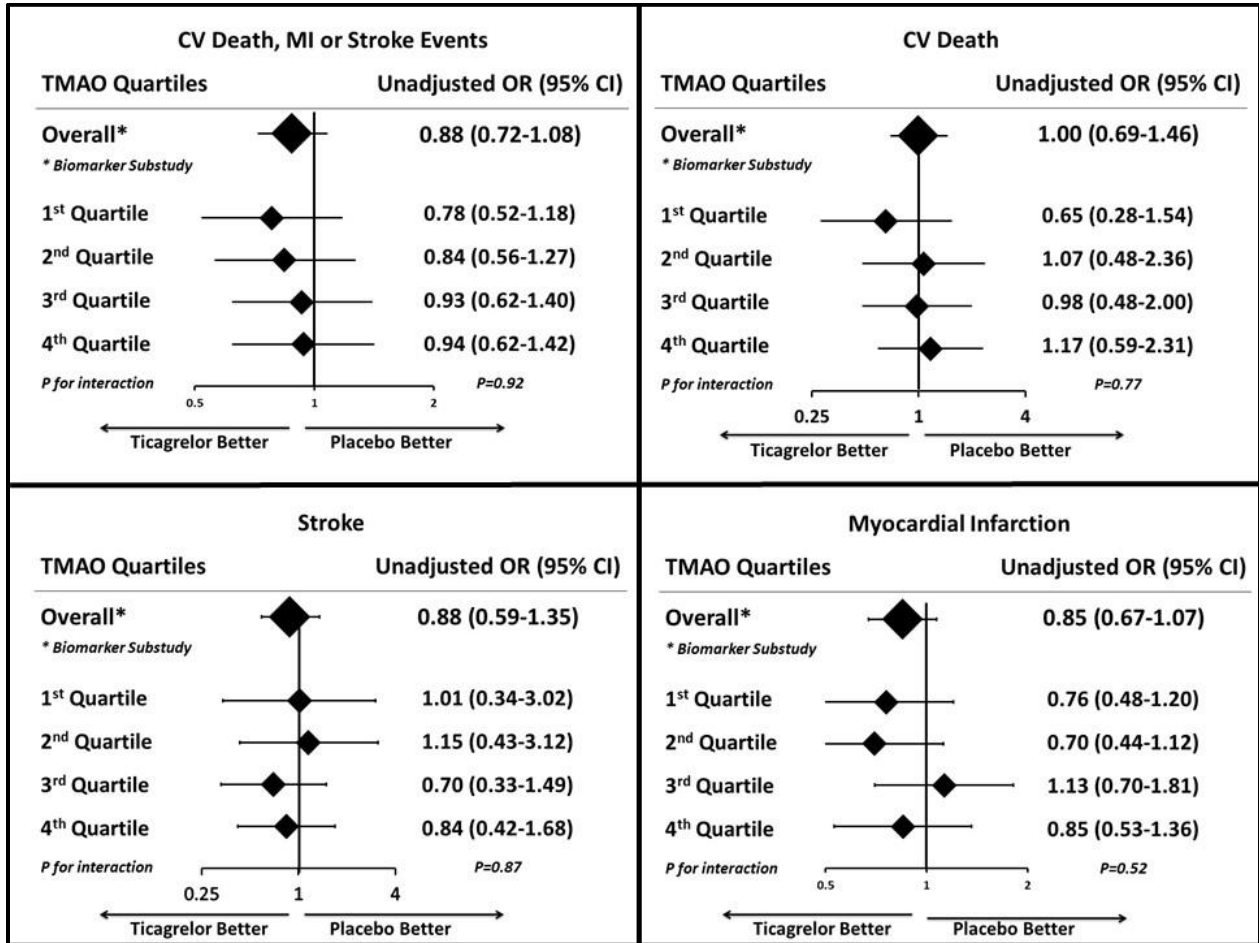

CI, confidence intervals; CV, Cardiovascular disease; MI, myocardial infarction; OR, odds ratio; TMAO, Trimethylamine N-oxide.
